# Supplementary material
Source: publisher site journal article supplement (https://www.spandidos-publications.com/3685/downloadSupplementary)
Supplement: Supplementary file 1 [file downloadSupplementary]

Table SI. Relationships between clinical characteristics and negative TERT expression in patients with hepatocellular carcinoma undergoing surgery.

| Variable                                       | TERT expression (-) (n=41) | TERT expression (+) (n=94) | P-value |
|------------------------------------------------|----------------------------|----------------------------|---------|
| Age <sup>a</sup> , years                       | 71 (67-75)                 | 69 (63-75)                 | 0.279   |
| Sex <sup>b</sup> , n                           |                            |                            | 0.573   |
| Male                                           | 30                         | 73                         |         |
| Female                                         | 11                         | 21                         |         |
| HBs antigen positive <sup>b</sup> , n          |                            |                            | 0.016   |
| Yes                                            | 6                          | 33                         |         |
| No                                             | 35                         | 61                         |         |
| HCV antibody positive <sup>b</sup> , n         |                            |                            | 0.193   |
| Yes                                            | 15                         | 24                         |         |
| No                                             | 26                         | 70                         |         |
| Child-Pugh class <sup>c</sup> , n              |                            |                            | 0.417   |
| A                                              | 33                         | 80                         |         |
| B                                              | 8                          | 13                         |         |
| Not available                                  | 0                          | 1                          |         |
| Liver cirrhosis <sup>c</sup> , n               |                            |                            | 0.044   |
| Yes                                            | 10                         | 40                         |         |
| No                                             | 30                         | 52                         |         |
| Not available                                  | 1                          | 2                          |         |
| Poor tumor differentiation <sup>c</sup> , n    |                            |                            | 0.069   |
| Yes                                            | 3                          | 19                         |         |
| No                                             | 37                         | 75                         |         |
| Not available                                  | 1                          | 0                          |         |
| AFP <sup>a</sup> , ng/ml                       | 4 (3-58)                   | 10 (4-92)                  | 0.849   |
| PIVKA-II <sup>a</sup> , mAU/ml                 | 38 (18-146)                | 79 (27-587)                | 0.239   |
| Size of largest tumor nodule <sup>a</sup> , cm | 3.2 (2.2-5.3)              | 3.0 (2.0-5.6)              | 0.135   |
| Tumor number <sup>b</sup> , n                  |                            |                            | 0.888   |
| ≥2                                             | 10                         | 24                         |         |
| 1                                              | 31                         | 70                         |         |
| Portal vein invasion <sup>b</sup> , n          |                            |                            | 0.249   |
| Yes                                            | 13                         | 21                         |         |
| No                                             | 28                         | 73                         |         |
| TNM stage <sup>b</sup> , n                     |                            |                            | 0.876   |
| I                                              | 19                         | 44                         |         |
| II                                             | 12                         | 24                         |         |
| III                                            | 10                         | 26                         |         |
| DNA-PKcs <sup>b</sup> , n                      |                            |                            | 0.027   |
| Positive                                       | 15                         | 38                         |         |
| Negative                                       | 14                         | 12                         |         |
| Not available                                  | 12                         | 44                         |         |

Continuous data are presented as the median (range). Associations were examined using <sup>a</sup>Mann-Whitney U test, <sup>b</sup> $\chi^2$  test and <sup>c</sup>Fisher's exact test, as appropriate. AFP,  $\alpha$ -fetoprotein; PIVKA-II, protein induced by vitamin K antagonist II; HBs, hepatitis B surface; HCV, hepatitis C virus; NA, not available; TNM, tumor-node-metastasis; DNA-PKcs, DNA-dependent protein kinase catalytic subunit.
